# Supplementary material for: Independent and combined associations of depressive symptoms and sleep disturbance with chronic pain in community-dwelling older adults
Source: PubMed Central journal article supplement — Pain Rep. 2022 Sep 14;7(5):e1034. doi: 10.1097/PR9.0000000000001034 (PMC9478345; doi:10.1097/pr9.0000000000001034), 2022-09-14
Supplement: painreports-7-e1034-s001.pdf [file painreports-7-e1034-s001.pdf]

**Suppl. Table S1. The ORs and 95% CIs of the presence of chronic pain according to the status of depressive symptoms and sleep disturbance in separate models**

| <b>Variable</b>         | <b>No. of participants</b> | <b>No. with chronic pain</b> | <b>Model 1<br/>OR (95%CI)</b> | <b>p-value</b> | <b>Model 2<br/>OR (95%CI)</b> | <b>p-value</b> |
|-------------------------|----------------------------|------------------------------|-------------------------------|----------------|-------------------------------|----------------|
| Depressive symptoms (-) | 1,084                      | 646                          | 1.00 (ref.)                   |                | 1.00 (ref.)                   |                |
| Depressive symptoms (+) | 290                        | 203                          | 1.48 (1.11–1.97)              | 0.008          | 1.28 (0.95–1.72)              | 0.110          |
| Sleep disturbance (-)   | 1,028                      | 598                          | 1.00 (ref.)                   |                | 1.00 (ref.)                   |                |
| Sleep disturbance (+)   | 346                        | 251                          | 1.93 (1.46–2.55)              | <0.001         | 1.83 (1.38–2.43)              | <0.001         |

ORs and 95% CIs were computed by using binomial logistic regression analysis. Model 1: adjusted for age, sex, education level, employment status, subjective economic status, comorbidities, current smoking, current drinking, regular exercise, living alone, number of communications with someone per month, and experiences of bereavement. Model 2: adjusted for the covariates in model 1+depressive symptoms were sleep disturbances-adjusted and sleep disturbance was depressive symptoms-adjusted.

Suppl. Table S2. The ORs and 95% CIs of presence of chronic pain with sleep disturbance alone against depression symptoms alone (n = 360 <sup>a)</sup>)

| Variable                  | No. of participants | No. with chronic pain | Multivariable-adjusted OR (95%CI) | p-value |
|---------------------------|---------------------|-----------------------|-----------------------------------|---------|
| Depressive symptoms alone | 152                 | 101                   | 1.00 (ref.)                       |         |
| Sleep disturbance alone   | 208                 | 149                   | 1.57 (0.97-2.53)                  | 0.066   |

ORs and 95% CIs were computed by using binomial logistic regression analysis.

a) 360 individuals with depressive symptoms alone or sleep disturbance alone were included in the analysis after excluding 1,014 individuals with neither- or both-conditions.

The multivariable model was adjusted for age, sex, education level, employment status, subjective economic status, comorbidities, current smoking, current drinking, regular exercise, living alone, number of communications with someone per month, and experiences of bereavement.
